# Supplementary material
Source: HighWire-hosted journal article supplement (https://www.cmajopen.ca/highwire/filestream/89157/field_highwire_adjunct_files/1/open-2021-0190-2-at.pdf)
Supplement: open-2021-0190-2-at.pdf [file open-2021-0190-2-at.pdf]

## Appendix: Datasets accessed at ICES

| Dataset                                           | Description                                                                                                                                                                                                                                                                                                                                                                                                                                                                                  |
|---------------------------------------------------|----------------------------------------------------------------------------------------------------------------------------------------------------------------------------------------------------------------------------------------------------------------------------------------------------------------------------------------------------------------------------------------------------------------------------------------------------------------------------------------------|
| Ontario Health Insurance Plan (OHIP)              | This database includes claims for reimbursement by Ontario physicians for inpatient and ambulatory services.                                                                                                                                                                                                                                                                                                                                                                                 |
| Discharge Abstracts Database (DAD)                | A registry of inpatient hospitalizations, maintained at CIHI captures administrative, clinical and demographic information on hospital discharges (including deaths, sign-outs and transfers).                                                                                                                                                                                                                                                                                               |
| National Ambulatory Care Reporting System (NACRS) | A registry of Emergency Department visits, maintained at CIHI, and includes information for all hospital and community-based ambulatory care, such as day surgery and emergency department visits including chief complaint (reason for visit). NACRS data are available from 2002 onwards.                                                                                                                                                                                                  |
| Ontario Mental Health Reporting System (OMHRS)    | Ontario Mental Health Reporting System (OMHRS) includes information about all individuals receiving adult mental health services in Ontario, including information about mental and physical health, social supports and service use.                                                                                                                                                                                                                                                        |
| Yearly Health Services Contact (CONTACT)          | An ICES dataset which includes data on all health system contacts in one year.                                                                                                                                                                                                                                                                                                                                                                                                               |
| Corporate Provider Database (CPDB)                | A registry of all providers and provider groups eligible to bill OHIP for their services. It contains addresses, registration and program eligibility information (e.g. contracts such as primary care group) about individual health care providers such as physicians, pharmacists, and other practitioners. This data also includes organizations such as provider groups, hospitals, independent health facilities, primary care groups, and alternate payment health care providers.    |
| ICES Physician Database (IPDB)                    | An ICES dataset which includes information about physicians practicing in Ontario. It is created at ICES using the following sources: Ontario Physician Human Resource Data Centre (OPHRDC), the OHIP Corporate Provider Database (CPDB), and the OHIP database of physician billings. The IPDB includes: demographic information about each physician (i.e., age, sex), practice location, physician specialty, services provided, where each physician was trained and year of graduation. |
| Ontario Census Area Profiles (CENSUS)             | This dataset includes dissemination area level demographic data from the 2016 Census of Population.                                                                                                                                                                                                                                                                                                                                                                                          |
| Registered Persons Database (RPDB)                | A registry of all Ontario residents eligible for the Ontario Health Insurance Plan.                                                                                                                                                                                                                                                                                                                                                                                                          |

Appendix 2, as supplied by the authors. Appendix to: Bayoumi I, Whitehead M, Li W, et al. Association of physician financial incentives with primary care enrolment of adults with serious mental illnesses in Ontario: a retrospective observational population-based study. *CMAJ Open* 2023. doi:10.9778/cmajo.2021-0190. Copyright © 2023 The Author(s) or their employer(s). To receive this resource in an accessible format, please contact us at [cmajgroup@cmaj.ca](mailto:cmajgroup@cmaj.ca).

|                                                                                                   |                                                                                                                                                                                                                                                                                                                                                                                                                                                                                                                                                                                         |
|---------------------------------------------------------------------------------------------------|-----------------------------------------------------------------------------------------------------------------------------------------------------------------------------------------------------------------------------------------------------------------------------------------------------------------------------------------------------------------------------------------------------------------------------------------------------------------------------------------------------------------------------------------------------------------------------------------|
| Postal Code Conversion File (PCCF)                                                                | A digital file which provides a correspondence between the Canada Post Corporation (CPC) six-character postal code and Statistics Canada's standard geographic areas for which census data and other statistics are produced.                                                                                                                                                                                                                                                                                                                                                           |
| Client Agency Program Enrolment (CAPE)                                                            | A database which includes all patients enrolled with a primary care physician within a primary care group and identifies patients enrolled in different primary care models over time, including separate reporting for physicians that were part of a Family Health Team.                                                                                                                                                                                                                                                                                                              |
| Primary Care Population (PCPOP)                                                                   | An ICES derived cohort which includes data on primary care rostering, models of care, and health system utilization for Ontario residents eligible for health services. PCPOP data are available from 2000 onward and each quarterly dataset includes basic demographic variable, information on primary care rostering identifying a patient's attachment status (rostered, virtually rostered or not rostered /not in patient enrollment model) along with a number of variables such as ED visits, hospitalization, access to specialty care, continuity of care and models of care. |
| Estimated Schedule of Benefits (SOB) price associated with each OHIP feecode and suffix. (ESTSOB) | Part of the Architected Payments dataset, used to derive payment of SMI premiums.                                                                                                                                                                                                                                                                                                                                                                                                                                                                                                       |
| GAPP Decision Support Systems (Physician Payments)                                                | Part of the Architected Payments dataset, used to derive payment of SMI premiums.                                                                                                                                                                                                                                                                                                                                                                                                                                                                                                       |

Appendix 2, as supplied by the authors. Appendix to: Bayoumi I, Whitehead M, Li W, et al. Association of physician financial incentives with primary care enrolment of adults with serious mental illnesses in Ontario: a retrospective observational population-based study. *CMAJ Open* 2023. doi:10.9778/cmajo.2021-0190. Copyright © 2023 The Author(s) or their employer(s). To receive this resource in an accessible format, please contact us at [cmajgroup@cmaj.ca](mailto:cmajgroup@cmaj.ca).
